# Supplementary material for: Tristetraprolin specifically regulates the expression and alternative splicing of immune response genes in HeLa cells
Source: BMC Immunol. 2019 May 2;20:13. doi: 10.1186/s12865-019-0292-1 (PMC6498542; doi:10.1186/s12865-019-0292-1)
Supplement: Supplementary file 6 — Up_KEGG_pathway_iden. (XLS 33 kb) [file 12865_2019_292_MOESM6_ESM.xls]

##Databases: KEGG PATHWAY
#fg	126
#bg	6644
##Statistical test method: hypergeometric test
##FDR correction method: Benjamini and Hochberg
#Term	Database	ID	Input number	Background number	P-Value	Corrected P-Value	Input	Hyperlink
Amphetamine addiction	KEGG PATHWAY	hsa05031	6	70	0.00200818860703	0.337375685981	CREB5|CAMK2A|CAMK2B|GRIN2B|GRIN2C|MAOA	http://www.genome.jp/kegg-bin/show_pathway?hsa05031/hsa:9586%09red/hsa:816%09red/hsa:815%09red/hsa:2905%09red/hsa:2904%09red/hsa:4128%09red
Insulin secretion	KEGG PATHWAY	hsa04911	6	87	0.00595857972585	0.363962935519	SNAP25|KCNJ11|CREB5|CAMK2A|CAMK2B|ATP1A3	http://www.genome.jp/kegg-bin/show_pathway?hsa04911/hsa:9586%09red/hsa:816%09red/hsa:815%09red/hsa:478%09red/hsa:3767%09red/hsa:6616%09red
ABC transporters	KEGG PATHWAY	hsa02010	4	44	0.00932067819118	0.363962935519	ABCA10|ABCA12|ABCA5|ABCG4	http://www.genome.jp/kegg-bin/show_pathway?hsa02010/hsa:10349%09red/hsa:64137%09red/hsa:26154%09red/hsa:23461%09red
MAPK signaling pathway	KEGG PATHWAY	hsa04010	11	260	0.0101070906598	0.363962935519	RASGRP1|HSPA6|IL1R1|CACNB2|PLA2G4C|MAP3K12|MAPK8IP2|PLA2G4E|RELB|MAPK8IP1|FGF1	http://www.genome.jp/kegg-bin/show_pathway?hsa04010/hsa:3554%09red/hsa:123745%09red/hsa:23542%09red/hsa:10125%09red/hsa:2246%09red/hsa:783%09red/hsa:3310%09red/hsa:5971%09red/hsa:8605%09red/hsa:7786%09red/hsa:9479%09red
Cocaine addiction	KEGG PATHWAY	hsa05030	4	50	0.0144982651215	0.363962935519	GRIN2B|GRIN2C|CREB5|MAOA	http://www.genome.jp/kegg-bin/show_pathway?hsa05030/hsa:2905%09red/hsa:2904%09red/hsa:4128%09red/hsa:9586%09red
Wnt signaling pathway	KEGG PATHWAY	hsa04310	7	141	0.0173533017343	0.363962935519	PRICKLE1|NKD2|CAMK2A|CAMK2B|WNT4|WNT5B|SOX17	http://www.genome.jp/kegg-bin/show_pathway?hsa04310/hsa:815%09red/hsa:816%09red/hsa:81029%09red/hsa:64321%09red/hsa:85409%09red/hsa:144165%09red/hsa:54361%09red
TNF signaling pathway	KEGG PATHWAY	hsa04668	6	110	0.0177971958962	0.363962935519	TRAF1|CXCL2|CCL5|CREB5|MMP9|CCL20	http://www.genome.jp/kegg-bin/show_pathway?hsa04668/hsa:4318%09red/hsa:9586%09red/hsa:2920%09red/hsa:6364%09red/hsa:6352%09red/hsa:7185%09red
Cholinergic synapse	KEGG PATHWAY	hsa04725	6	113	0.0200591816195	0.363962935519	CREB5|CAMK2A|CAMK2B|CHRNA7|CHRM1|ACHE	http://www.genome.jp/kegg-bin/show_pathway?hsa04725/hsa:9586%09red/hsa:816%09red/hsa:815%09red/hsa:1128%09red/hsa:1139%09red/hsa:43%09red
Chemokine signaling pathway	KEGG PATHWAY	hsa04062	8	189	0.0267830090148	0.363962935519	CXCL2|ITK|SHC2|CCL5|VAV1|CXCL11|CCL20|CCL26	http://www.genome.jp/kegg-bin/show_pathway?hsa04062/hsa:10344%09red/hsa:2920%09red/hsa:6373%09red/hsa:3702%09red/hsa:25759%09red/hsa:6352%09red/hsa:7409%09red/hsa:6364%09red
Hippo signaling pathway	KEGG PATHWAY	hsa04390	7	156	0.0283711912194	0.363962935519	ID2|ID3|PARD6A|WNT4|WNT5B|WTIP|FGF1	http://www.genome.jp/kegg-bin/show_pathway?hsa04390/hsa:81029%09red/hsa:2246%09red/hsa:126374%09red/hsa:3399%09red/hsa:3398%09red/hsa:50855%09red/hsa:54361%09red
NF-kappa B signaling pathway	KEGG PATHWAY	hsa04064	5	92	0.0300619679025	0.363962935519	RELB|DDX58|CXCL2|IL1R1|TRAF1	http://www.genome.jp/kegg-bin/show_pathway?hsa04064/hsa:2920%09red/hsa:23586%09red/hsa:5971%09red/hsa:3554%09red/hsa:7185%09red
GnRH signaling pathway	KEGG PATHWAY	hsa04912	5	92	0.0300619679025	0.363962935519	CGA|PLA2G4C|CAMK2B|CAMK2A|PLA2G4E	http://www.genome.jp/kegg-bin/show_pathway?hsa04912/hsa:816%09red/hsa:8605%09red/hsa:815%09red/hsa:1081%09red/hsa:123745%09red
VEGF signaling pathway	KEGG PATHWAY	hsa04370	4	63	0.0311078574241	0.363962935519	PLA2G4C|SPHK1|SHC2|PLA2G4E	http://www.genome.jp/kegg-bin/show_pathway?hsa04370/hsa:8605%09red/hsa:25759%09red/hsa:8877%09red/hsa:123745%09red
Dopaminergic synapse	KEGG PATHWAY	hsa04728	6	131	0.0377935674263	0.363962935519	KIF5A|CREB5|CAMK2A|CAMK2B|GRIN2B|MAOA	http://www.genome.jp/kegg-bin/show_pathway?hsa04728/hsa:9586%09red/hsa:816%09red/hsa:815%09red/hsa:2904%09red/hsa:3798%09red/hsa:4128%09red
Nicotine addiction	KEGG PATHWAY	hsa05033	3	40	0.0395449984039	0.363962935519	GRIN2B|GRIN2C|CHRNA7	http://www.genome.jp/kegg-bin/show_pathway?hsa05033/hsa:2905%09red/hsa:2904%09red/hsa:1139%09red
Arachidonic acid metabolism	KEGG PATHWAY	hsa00590	4	68	0.0395976755823	0.363962935519	PLA2G4C|CYP4F2|CYP4F3|PLA2G4E	http://www.genome.jp/kegg-bin/show_pathway?hsa00590/hsa:4051%09red/hsa:8529%09red/hsa:123745%09red/hsa:8605%09red
Estrogen signaling pathway	KEGG PATHWAY	hsa04915	5	100	0.0408979112881	0.363962935519	CREB5|ESR1|HSPA6|SHC2|MMP9	http://www.genome.jp/kegg-bin/show_pathway?hsa04915/hsa:4318%09red/hsa:25759%09red/hsa:9586%09red/hsa:2099%09red/hsa:3310%09red
Long-term potentiation	KEGG PATHWAY	hsa04720	4	69	0.0414393054868	0.363962935519	GRIN2B|GRIN2C|CAMK2A|CAMK2B	http://www.genome.jp/kegg-bin/show_pathway?hsa04720/hsa:2905%09red/hsa:2904%09red/hsa:815%09red/hsa:816%09red
Measles	KEGG PATHWAY	hsa05162	6	134	0.041489531121	0.363962935519	IFIH1|HSPA6|SH2D1A|DDX58|MX1|OAS2	http://www.genome.jp/kegg-bin/show_pathway?hsa05162/hsa:64135%09red/hsa:4599%09red/hsa:3310%09red/hsa:4939%09red/hsa:4068%09red/hsa:23586%09red
Fc epsilon RI signaling pathway	KEGG PATHWAY	hsa04664	4	70	0.0433289208951	0.363962935519	VAV1|PLA2G4C|INPP5D|PLA2G4E	http://www.genome.jp/kegg-bin/show_pathway?hsa04664/hsa:8605%09red/hsa:7409%09red/hsa:123745%09red/hsa:3635%09red
Prolactin signaling pathway	KEGG PATHWAY	hsa04917	4	72	0.047252027899	0.366271977987	CGA|SOCS2|SHC2|ESR1	http://www.genome.jp/kegg-bin/show_pathway?hsa04917/hsa:8835%09red/hsa:25759%09red/hsa:1081%09red/hsa:2099%09red
Influenza A	KEGG PATHWAY	hsa05164	7	176	0.0493665175882	0.366271977987	IFIH1|HSPA6|CCL5|DDX58|MX1|OAS2|RSAD2	http://www.genome.jp/kegg-bin/show_pathway?hsa05164/hsa:64135%09red/hsa:4599%09red/hsa:23586%09red/hsa:3310%09red/hsa:4939%09red/hsa:6352%09red/hsa:91543%09red
Gastric acid secretion	KEGG PATHWAY	hsa04971	4	75	0.0534953911589	0.366271977987	ATP1A3|MYLK2|CAMK2A|CAMK2B	http://www.genome.jp/kegg-bin/show_pathway?hsa04971/hsa:816%09red/hsa:85366%09red/hsa:478%09red/hsa:815%09red
Alcoholism	KEGG PATHWAY	hsa05034	7	180	0.0545047586291	0.366271977987	SHC2|CREB5|GRIN2B|GRIN2C|MAOA|HIST2H4A|HIST1H2AB	http://www.genome.jp/kegg-bin/show_pathway?hsa05034/hsa:9586%09red/hsa:25759%09red/hsa:4128%09red/hsa:8370%09red/hsa:2905%09red/hsa:2904%09red/hsa:8335%09red
Tuberculosis	KEGG PATHWAY	hsa05152	7	180	0.0545047586291	0.366271977987	CD74|SPHK1|IL23A|CAMK2A|CAMK2B|CORO1A|ITGAM	http://www.genome.jp/kegg-bin/show_pathway?hsa05152/hsa:51561%09red/hsa:11151%09red/hsa:816%09red/hsa:815%09red/hsa:3684%09red/hsa:972%09red/hsa:8877%09red
Calcium signaling pathway	KEGG PATHWAY	hsa04020	7	183	0.0585713510093	0.378461037291	SPHK1|MYLK2|CAMK2A|CHRM1|GRIN2C|CHRNA7|CAMK2B	http://www.genome.jp/kegg-bin/show_pathway?hsa04020/hsa:85366%09red/hsa:816%09red/hsa:815%09red/hsa:1128%09red/hsa:8877%09red/hsa:2905%09red/hsa:1139%09red
Herpes simplex infection	KEGG PATHWAY	hsa05168	7	185	0.0613845353978	0.381948220253	CD74|TRAF1|IFIH1|CCL5|HLA-F|OAS2|DDX58	http://www.genome.jp/kegg-bin/show_pathway?hsa05168/hsa:972%09red/hsa:64135%09red/hsa:4939%09red/hsa:6352%09red/hsa:23586%09red/hsa:7185%09red/hsa:3134%09red
Ovarian steroidogenesis	KEGG PATHWAY	hsa04913	3	51	0.0718806408717	0.422901053712	CGA|PLA2G4C|PLA2G4E	http://www.genome.jp/kegg-bin/show_pathway?hsa04913/hsa:8605%09red/hsa:1081%09red/hsa:123745%09red
Glutamatergic synapse	KEGG PATHWAY	hsa04724	5	118	0.0730007771289	0.422901053712	GRIN2B|GRIN2C|DLGAP1|PLA2G4C|PLA2G4E	http://www.genome.jp/kegg-bin/show_pathway?hsa04724/hsa:2905%09red/hsa:2904%09red/hsa:9229%09red/hsa:123745%09red/hsa:8605%09red
Neuroactive ligand-receptor interaction	KEGG PATHWAY	hsa04080	9	275	0.0767631117271	0.423386704158	GRID1|CALCRL|CGA|CHRM1|GRIN2B|GRIN2C|CHRNA7|LPAR2|CHRNA9	http://www.genome.jp/kegg-bin/show_pathway?hsa04080/hsa:1081%09red/hsa:55584%09red/hsa:2894%09red/hsa:1128%09red/hsa:1139%09red/hsa:2904%09red/hsa:10203%09red/hsa:2905%09red/hsa:9170%09red
Vascular smooth muscle contraction	KEGG PATHWAY	hsa04270	5	121	0.0793942611059	0.423386704158	ACTA2|PLA2G4C|MYLK2|PLA2G4E|CALCRL	http://www.genome.jp/kegg-bin/show_pathway?hsa04270/hsa:8605%09red/hsa:85366%09red/hsa:123745%09red/hsa:59%09red/hsa:10203%09red
alpha-Linolenic acid metabolism	KEGG PATHWAY	hsa00592	2	25	0.0806450865063	0.423386704158	PLA2G4C|PLA2G4E	http://www.genome.jp/kegg-bin/show_pathway?hsa00592/hsa:8605%09red/hsa:123745%09red
Legionellosis	KEGG PATHWAY	hsa05134	3	55	0.0858424898149	0.43326537429	CXCL2|HSPA6|ITGAM	http://www.genome.jp/kegg-bin/show_pathway?hsa05134/hsa:2920%09red/hsa:3684%09red/hsa:3310%09red
Epstein-Barr virus infection	KEGG PATHWAY	hsa05169	7	202	0.0886206772421	0.43326537429	TRAF1|DDX58|HSPA6|ENTPD1|HLA-F|RELB|POLR2J2	http://www.genome.jp/kegg-bin/show_pathway?hsa05169/hsa:953%09red/hsa:3310%09red/hsa:5971%09red/hsa:23586%09red/hsa:7185%09red/hsa:246721%09red/hsa:3134%09red
Rheumatoid arthritis	KEGG PATHWAY	hsa05323	4	90	0.0909973314091	0.43326537429	CCL20|MMP1|IL23A|CCL5	http://www.genome.jp/kegg-bin/show_pathway?hsa05323/hsa:4312%09red/hsa:6364%09red/hsa:51561%09red/hsa:6352%09red
Fc gamma R-mediated phagocytosis	KEGG PATHWAY	hsa04666	4	91	0.0938545980152	0.43326537429	VAV1|SPHK1|INPP5D|PLA2G4E	http://www.genome.jp/kegg-bin/show_pathway?hsa04666/hsa:8877%09red/hsa:7409%09red/hsa:123745%09red/hsa:3635%09red
Focal adhesion	KEGG PATHWAY	hsa04510	7	207	0.0977602945678	0.43326537429	PGF|SHC2|VAV1|MYLK2|ITGA7|COL27A1|LAMB4	http://www.genome.jp/kegg-bin/show_pathway?hsa04510/hsa:5228%09red/hsa:85366%09red/hsa:25759%09red/hsa:3679%09red/hsa:85301%09red/hsa:22798%09red/hsa:7409%09red
Histidine metabolism	KEGG PATHWAY	hsa00340	2	28	0.0980005013274	0.43326537429	MAOA|CARNS1	http://www.genome.jp/kegg-bin/show_pathway?hsa00340/hsa:4128%09red/hsa:57571%09red
Circadian entrainment	KEGG PATHWAY	hsa04713	4	97	0.111871651263	0.476407433185	GRIN2B|GRIN2C|CAMK2A|CAMK2B	http://www.genome.jp/kegg-bin/show_pathway?hsa04713/hsa:2905%09red/hsa:2904%09red/hsa:815%09red/hsa:816%09red
Regulation of actin cytoskeleton	KEGG PATHWAY	hsa04810	7	215	0.113430341234	0.476407433185	VAV1|MYLK2|CHRM1|ITGA7|INSRR|FGF1|ITGAM	http://www.genome.jp/kegg-bin/show_pathway?hsa04810/hsa:85366%09red/hsa:2246%09red/hsa:3679%09red/hsa:3684%09red/hsa:1128%09red/hsa:7409%09red/hsa:3645%09red
Melanogenesis	KEGG PATHWAY	hsa04916	4	101	0.124677308086	0.494360611895	WNT5B|CAMK2A|CAMK2B|WNT4	http://www.genome.jp/kegg-bin/show_pathway?hsa04916/hsa:816%09red/hsa:81029%09red/hsa:815%09red/hsa:54361%09red
Glioma	KEGG PATHWAY	hsa05214	3	65	0.125175541765	0.494360611895	CAMK2B|CAMK2A|SHC2	http://www.genome.jp/kegg-bin/show_pathway?hsa05214/hsa:25759%09red/hsa:816%09red/hsa:815%09red
Linoleic acid metabolism	KEGG PATHWAY	hsa00591	2	33	0.128926701217	0.494360611895	PLA2G4C|PLA2G4E	http://www.genome.jp/kegg-bin/show_pathway?hsa00591/hsa:8605%09red/hsa:123745%09red
Cytokine-cytokine receptor interaction	KEGG PATHWAY	hsa04060	8	266	0.131753575315	0.494360611895	CXCL2|IL23A|CCL5|IL24|CXCL11|CCL20|IL1R1|CCL26	http://www.genome.jp/kegg-bin/show_pathway?hsa04060/hsa:51561%09red/hsa:3554%09red/hsa:2920%09red/hsa:6373%09red/hsa:11009%09red/hsa:6352%09red/hsa:6364%09red/hsa:10344%09red
Proteoglycans in cancer	KEGG PATHWAY	hsa05205	7	225	0.134774889261	0.494360611895	ESR1|CAMK2A|CAMK2B|WNT4|MMP9|WNT5B|FGF1	http://www.genome.jp/kegg-bin/show_pathway?hsa05205/hsa:4318%09red/hsa:815%09red/hsa:816%09red/hsa:81029%09red/hsa:2246%09red/hsa:2099%09red/hsa:54361%09red
African trypanosomiasis	KEGG PATHWAY	hsa05143	2	34	0.135360643733	0.494360611895	IDO1|APOL1	http://www.genome.jp/kegg-bin/show_pathway?hsa05143/hsa:8542%09red/hsa:3620%09red
Hepatitis B	KEGG PATHWAY	hsa05161	5	147	0.14646564684	0.503669283396	DDX58|EGR3|IFIH1|CREB5|MMP9	http://www.genome.jp/kegg-bin/show_pathway?hsa05161/hsa:64135%09red/hsa:4318%09red/hsa:1960%09red/hsa:9586%09red/hsa:23586%09red
SNARE interactions in vesicular transport	KEGG PATHWAY	hsa04130	2	36	0.148435435828	0.503669283396	SNAP25|STX3	http://www.genome.jp/kegg-bin/show_pathway?hsa04130/hsa:6809%09red/hsa:6616%09red
RIG-I-like receptor signaling pathway	KEGG PATHWAY	hsa04622	3	71	0.151370735027	0.503669283396	IFIH1|ISG15|DDX58	http://www.genome.jp/kegg-bin/show_pathway?hsa04622/hsa:64135%09red/hsa:9636%09red/hsa:23586%09red
Amoebiasis	KEGG PATHWAY	hsa05146	4	109	0.152032121672	0.503669283396	COL27A1|ITGAM|IL1R1|LAMB4	http://www.genome.jp/kegg-bin/show_pathway?hsa05146/hsa:22798%09red/hsa:3554%09red/hsa:85301%09red/hsa:3684%09red
Bile secretion	KEGG PATHWAY	hsa04976	3	72	0.155897635337	0.503669283396	NR1H4|SLC51B|ATP1A3	http://www.genome.jp/kegg-bin/show_pathway?hsa04976/hsa:9971%09red/hsa:478%09red/hsa:123264%09red
Thyroid hormone synthesis	KEGG PATHWAY	hsa04918	3	72	0.155897635337	0.503669283396	CGA|CREB5|ATP1A3	http://www.genome.jp/kegg-bin/show_pathway?hsa04918/hsa:478%09red/hsa:1081%09red/hsa:9586%09red
Bladder cancer	KEGG PATHWAY	hsa05219	2	38	0.161754010988	0.505479788699	MMP1|MMP9	http://www.genome.jp/kegg-bin/show_pathway?hsa05219/hsa:4312%09red/hsa:4318%09red
Pathways in cancer	KEGG PATHWAY	hsa05200	9	327	0.167221373488	0.505479788699	PGF|TRAF1|EGLN2|WNT4|MMP9|WNT5B|LAMB4|FGF1|MMP1	http://www.genome.jp/kegg-bin/show_pathway?hsa05200/hsa:5228%09red/hsa:4318%09red/hsa:4312%09red/hsa:112398%09red/hsa:81029%09red/hsa:2246%09red/hsa:22798%09red/hsa:54361%09red/hsa:7185%09red
Tyrosine metabolism	KEGG PATHWAY	hsa00350	2	39	0.1684932629	0.505479788699	HGD|MAOA	http://www.genome.jp/kegg-bin/show_pathway?hsa00350/hsa:4128%09red/hsa:3081%09red
Aldosterone-regulated sodium reabsorption	KEGG PATHWAY	hsa04960	2	39	0.1684932629	0.505479788699	FXYD4|ATP1A3	http://www.genome.jp/kegg-bin/show_pathway?hsa04960/hsa:53828%09red/hsa:478%09red
Tryptophan metabolism	KEGG PATHWAY	hsa00380	2	40	0.175280013663	0.516614777111	MAOA|IDO1	http://www.genome.jp/kegg-bin/show_pathway?hsa00380/hsa:3620%09red/hsa:4128%09red
Antigen processing and presentation	KEGG PATHWAY	hsa04612	3	78	0.183895467792	0.527497900529	CD74|HSPA6|HLA-F	http://www.genome.jp/kegg-bin/show_pathway?hsa04612/hsa:3134%09red/hsa:972%09red/hsa:3310%09red
Leukocyte transendothelial migration	KEGG PATHWAY	hsa04670	4	118	0.185252238876	0.527497900529	VAV1|ITK|ITGAM|MMP9	http://www.genome.jp/kegg-bin/show_pathway?hsa04670/hsa:4318%09red/hsa:3684%09red/hsa:7409%09red/hsa:3702%09red
Ether lipid metabolism	KEGG PATHWAY	hsa00565	2	42	0.188979436831	0.529142423127	PLA2G4C|PLA2G4E	http://www.genome.jp/kegg-bin/show_pathway?hsa00565/hsa:8605%09red/hsa:123745%09red
TGF-beta signaling pathway	KEGG PATHWAY	hsa04350	3	80	0.193512936266	0.532953660535	CHRD|ID2|ID3	http://www.genome.jp/kegg-bin/show_pathway?hsa04350/hsa:8646%09red/hsa:3399%09red/hsa:3398%09red
Riboflavin metabolism	KEGG PATHWAY	hsa00740	1	13	0.220523844522	0.593383133256	ACPP	http://www.genome.jp/kegg-bin/show_pathway?hsa00740/hsa:55%09red
ECM-receptor interaction	KEGG PATHWAY	hsa04512	3	87	0.228079472616	0.593383133256	COL27A1|LAMB4|ITGA7	http://www.genome.jp/kegg-bin/show_pathway?hsa04512/hsa:22798%09red/hsa:3679%09red/hsa:85301%09red
Endocrine and other factor-regulated calcium reabsorption	KEGG PATHWAY	hsa04961	2	48	0.230810847494	0.593383133256	ATP1A3|ESR1	http://www.genome.jp/kegg-bin/show_pathway?hsa04961/hsa:478%09red/hsa:2099%09red
Type II diabetes mellitus	KEGG PATHWAY	hsa04930	2	48	0.230810847494	0.593383133256	KCNJ11|SOCS2	http://www.genome.jp/kegg-bin/show_pathway?hsa04930/hsa:8835%09red/hsa:3767%09red
ErbB signaling pathway	KEGG PATHWAY	hsa04012	3	88	0.23311480235	0.593383133256	CAMK2B|CAMK2A|SHC2	http://www.genome.jp/kegg-bin/show_pathway?hsa04012/hsa:25759%09red/hsa:816%09red/hsa:815%09red
Glycerophospholipid metabolism	KEGG PATHWAY	hsa00564	3	91	0.248338376703	0.605084973493	PLA2G4C|ACHE|PLA2G4E	http://www.genome.jp/kegg-bin/show_pathway?hsa00564/hsa:8605%09red/hsa:43%09red/hsa:123745%09red
Mineral absorption	KEGG PATHWAY	hsa04978	2	51	0.251968960289	0.605084973493	TRPV6|ATP1A3	http://www.genome.jp/kegg-bin/show_pathway?hsa04978/hsa:55503%09red/hsa:478%09red
Hedgehog signaling pathway	KEGG PATHWAY	hsa04340	2	51	0.251968960289	0.605084973493	WNT5B|WNT4	http://www.genome.jp/kegg-bin/show_pathway?hsa04340/hsa:81029%09red/hsa:54361%09red
Transcriptional misregulation in cancer	KEGG PATHWAY	hsa05202	5	179	0.252118738955	0.605084973493	TRAF1|ID2|HMGA2|ITGAM|MMP9	http://www.genome.jp/kegg-bin/show_pathway?hsa05202/hsa:4318%09red/hsa:3398%09red/hsa:8091%09red/hsa:3684%09red/hsa:7185%09red
Amyotrophic lateral sclerosis (ALS)	KEGG PATHWAY	hsa05014	2	53	0.266108087688	0.620918871272	GRIN2B|GRIN2C	http://www.genome.jp/kegg-bin/show_pathway?hsa05014/hsa:2905%09red/hsa:2904%09red
Autoimmune thyroid disease	KEGG PATHWAY	hsa05320	2	53	0.266108087688	0.620918871272	CGA|HLA-F	http://www.genome.jp/kegg-bin/show_pathway?hsa05320/hsa:1081%09red/hsa:3134%09red
Basal cell carcinoma	KEGG PATHWAY	hsa05217	2	55	0.280248880397	0.64226488719	WNT5B|WNT4	http://www.genome.jp/kegg-bin/show_pathway?hsa05217/hsa:81029%09red/hsa:54361%09red
Phenylalanine metabolism	KEGG PATHWAY	hsa00360	1	18	0.291839812093	0.64226488719	MAOA	http://www.genome.jp/kegg-bin/show_pathway?hsa00360/hsa:4128%09red
Steroid biosynthesis	KEGG PATHWAY	hsa00100	1	18	0.291839812093	0.64226488719	CYP24A1	http://www.genome.jp/kegg-bin/show_pathway?hsa00100/hsa:1591%09red
Arginine and proline metabolism	KEGG PATHWAY	hsa00330	2	57	0.294371406629	0.64226488719	MAOA|CARNS1	http://www.genome.jp/kegg-bin/show_pathway?hsa00330/hsa:4128%09red/hsa:57571%09red
NOD-like receptor signaling pathway	KEGG PATHWAY	hsa04621	2	57	0.294371406629	0.64226488719	CXCL2|CCL5	http://www.genome.jp/kegg-bin/show_pathway?hsa04621/hsa:6352%09red/hsa:2920%09red
Long-term depression	KEGG PATHWAY	hsa04730	2	60	0.315480949126	0.664986836169	PLA2G4C|PLA2G4E	http://www.genome.jp/kegg-bin/show_pathway?hsa04730/hsa:8605%09red/hsa:123745%09red
Inositol phosphate metabolism	KEGG PATHWAY	hsa00562	2	61	0.32248921372	0.664986836169	INPP5J|INPP5D	http://www.genome.jp/kegg-bin/show_pathway?hsa00562/hsa:27124%09red/hsa:3635%09red
HIF-1 signaling pathway	KEGG PATHWAY	hsa04066	3	106	0.326087341682	0.664986836169	EGLN2|CAMK2A|CAMK2B	http://www.genome.jp/kegg-bin/show_pathway?hsa04066/hsa:816%09red/hsa:815%09red/hsa:112398%09red
T cell receptor signaling pathway	KEGG PATHWAY	hsa04660	3	106	0.326087341682	0.664986836169	VAV1|RASGRP1|ITK	http://www.genome.jp/kegg-bin/show_pathway?hsa04660/hsa:3702%09red/hsa:10125%09red/hsa:7409%09red
Toll-like receptor signaling pathway	KEGG PATHWAY	hsa04620	3	107	0.331311374537	0.664986836169	CXCL11|IRF5|CCL5	http://www.genome.jp/kegg-bin/show_pathway?hsa04620/hsa:6373%09red/hsa:3663%09red/hsa:6352%09red
PI3K-Akt signaling pathway	KEGG PATHWAY	hsa04151	8	346	0.333790803536	0.664986836169	PGF|CREB5|CHRM1|ITGA7|COL27A1|LPAR2|LAMB4|FGF1	http://www.genome.jp/kegg-bin/show_pathway?hsa04151/hsa:5228%09red/hsa:9586%09red/hsa:2246%09red/hsa:3679%09red/hsa:85301%09red/hsa:1128%09red/hsa:22798%09red/hsa:9170%09red
Synaptic vesicle cycle	KEGG PATHWAY	hsa04721	2	63	0.336451673062	0.664986836169	SNAP25|STX3	http://www.genome.jp/kegg-bin/show_pathway?hsa04721/hsa:6809%09red/hsa:6616%09red
Cytosolic DNA-sensing pathway	KEGG PATHWAY	hsa04623	2	63	0.336451673062	0.664986836169	DDX58|CCL5	http://www.genome.jp/kegg-bin/show_pathway?hsa04623/hsa:6352%09red/hsa:23586%09red
Endocytosis	KEGG PATHWAY	hsa04144	5	203	0.341021502906	0.66618154056	HLA-F|MVB12B|HSPA6|PARD6A|SH3GL2	http://www.genome.jp/kegg-bin/show_pathway?hsa04144/hsa:50855%09red/hsa:89853%09red/hsa:3134%09red/hsa:6456%09red/hsa:3310%09red
Viral carcinogenesis	KEGG PATHWAY	hsa05203	5	207	0.356185183133	0.680930675603	TRAF1|CREB5|HIST2H4A|HLA-F|EGR3	http://www.genome.jp/kegg-bin/show_pathway?hsa05203/hsa:7185%09red/hsa:8370%09red/hsa:1960%09red/hsa:9586%09red/hsa:3134%09red
Proximal tubule bicarbonate reclamation	KEGG PATHWAY	hsa04964	1	23	0.356677972935	0.680930675603	ATP1A3	http://www.genome.jp/kegg-bin/show_pathway?hsa04964/hsa:478%09red
Serotonergic synapse	KEGG PATHWAY	hsa04726	3	114	0.367809889914	0.688651826592	PLA2G4C|MAOA|PLA2G4E	http://www.genome.jp/kegg-bin/show_pathway?hsa04726/hsa:8605%09red/hsa:4128%09red/hsa:123745%09red
Vitamin digestion and absorption	KEGG PATHWAY	hsa04977	1	24	0.368920621389	0.688651826592	TCN2	http://www.genome.jp/kegg-bin/show_pathway?hsa04977/hsa:6948%09red
Complement and coagulation cascades	KEGG PATHWAY	hsa04610	2	69	0.377782430837	0.697444487698	TFPI|SERPINF2	http://www.genome.jp/kegg-bin/show_pathway?hsa04610/hsa:7035%09red/hsa:5345%09red
HTLV-I infection	KEGG PATHWAY	hsa05166	6	264	0.385139110839	0.70329750675	HLA-F|WNT4|ZFP36|WNT5B|RELB|IL1R1	http://www.genome.jp/kegg-bin/show_pathway?hsa05166/hsa:7538%09red/hsa:3554%09red/hsa:81029%09red/hsa:5971%09red/hsa:54361%09red/hsa:3134%09red
Glycosphingolipid biosynthesis - lacto and neolacto series	KEGG PATHWAY	hsa00601	1	26	0.392716745482	0.709423798289	FUT3	http://www.genome.jp/kegg-bin/show_pathway?hsa00601/hsa:2525%09red
Neurotrophin signaling pathway	KEGG PATHWAY	hsa04722	3	120	0.398840636322	0.712821562788	CAMK2B|CAMK2A|SHC2	http://www.genome.jp/kegg-bin/show_pathway?hsa04722/hsa:25759%09red/hsa:816%09red/hsa:815%09red
B cell receptor signaling pathway	KEGG PATHWAY	hsa04662	2	74	0.411410103803	0.72401347757	VAV1|INPP5D	http://www.genome.jp/kegg-bin/show_pathway?hsa04662/hsa:3635%09red/hsa:7409%09red
Pertussis	KEGG PATHWAY	hsa05133	2	75	0.418031591216	0.72401347757	ITGAM|IL23A	http://www.genome.jp/kegg-bin/show_pathway?hsa05133/hsa:51561%09red/hsa:3684%09red
Arrhythmogenic right ventricular cardiomyopathy (ARVC)	KEGG PATHWAY	hsa05412	2	75	0.418031591216	0.72401347757	CACNB2|ITGA7	http://www.genome.jp/kegg-bin/show_pathway?hsa05412/hsa:783%09red/hsa:3679%09red
beta-Alanine metabolism	KEGG PATHWAY	hsa00410	1	29	0.426751761424	0.731574448155	CARNS1	http://www.genome.jp/kegg-bin/show_pathway?hsa00410/hsa:57571%09red
Cardiac muscle contraction	KEGG PATHWAY	hsa04260	2	77	0.43116199104	0.73166883328	CACNB2|ATP1A3	http://www.genome.jp/kegg-bin/show_pathway?hsa04260/hsa:478%09red/hsa:783%09red
Other types of O-glycan biosynthesis	KEGG PATHWAY	hsa00514	1	30	0.437670775492	0.731806632775	MFNG	http://www.genome.jp/kegg-bin/show_pathway?hsa00514/hsa:4242%09red
Mucin type O-Glycan biosynthesis	KEGG PATHWAY	hsa00512	1	31	0.448383427788	0.731806632775	GALNT16	http://www.genome.jp/kegg-bin/show_pathway?hsa00512/hsa:57452%09red
Phosphatidylinositol signaling system	KEGG PATHWAY	hsa04070	2	81	0.456946920908	0.731806632775	INPP5J|INPP5D	http://www.genome.jp/kegg-bin/show_pathway?hsa04070/hsa:27124%09red/hsa:3635%09red
Propanoate metabolism	KEGG PATHWAY	hsa00640	1	32	0.458893587791	0.731806632775	LDHC	http://www.genome.jp/kegg-bin/show_pathway?hsa00640/hsa:3948%09red
RNA polymerase	KEGG PATHWAY	hsa03020	1	32	0.458893587791	0.731806632775	POLR2J2	http://www.genome.jp/kegg-bin/show_pathway?hsa03020/hsa:246721%09red
Huntington's disease	KEGG PATHWAY	hsa05016	4	183	0.459339953885	0.731806632775	GRIN2B|CREB5|HAP1|POLR2J2	http://www.genome.jp/kegg-bin/show_pathway?hsa05016/hsa:9001%09red/hsa:246721%09red/hsa:9586%09red/hsa:2904%09red
Systemic lupus erythematosus	KEGG PATHWAY	hsa05322	3	135	0.474313617192	0.731806632775	GRIN2B|HIST2H4A|HIST1H2AB	http://www.genome.jp/kegg-bin/show_pathway?hsa05322/hsa:2904%09red/hsa:8370%09red/hsa:8335%09red
Hypertrophic cardiomyopathy (HCM)	KEGG PATHWAY	hsa05410	2	84	0.475844121947	0.731806632775	CACNB2|ITGA7	http://www.genome.jp/kegg-bin/show_pathway?hsa05410/hsa:783%09red/hsa:3679%09red
Cysteine and methionine metabolism	KEGG PATHWAY	hsa00270	1	34	0.479321550247	0.731806632775	LDHC	http://www.genome.jp/kegg-bin/show_pathway?hsa00270/hsa:3948%09red
Natural killer cell mediated cytotoxicity	KEGG PATHWAY	hsa04650	3	137	0.484070225851	0.731806632775	VAV1|SH2D1A|SHC2	http://www.genome.jp/kegg-bin/show_pathway?hsa04650/hsa:25759%09red/hsa:4068%09red/hsa:7409%09red
Small cell lung cancer	KEGG PATHWAY	hsa05222	2	86	0.488221839194	0.731806632775	TRAF1|LAMB4	http://www.genome.jp/kegg-bin/show_pathway?hsa05222/hsa:22798%09red/hsa:7185%09red
Salmonella infection	KEGG PATHWAY	hsa05132	2	87	0.494342836055	0.731806632775	KLC3|CXCL2	http://www.genome.jp/kegg-bin/show_pathway?hsa05132/hsa:147700%09red/hsa:2920%09red
Prion diseases	KEGG PATHWAY	hsa05020	1	36	0.498984202784	0.731806632775	CCL5	http://www.genome.jp/kegg-bin/show_pathway?hsa05020/hsa:6352%09red
Hematopoietic cell lineage	KEGG PATHWAY	hsa04640	2	88	0.500417906606	0.731806632775	ITGAM|IL1R1	http://www.genome.jp/kegg-bin/show_pathway?hsa04640/hsa:3554%09red/hsa:3684%09red
Protein digestion and absorption	KEGG PATHWAY	hsa04974	2	88	0.500417906606	0.731806632775	COL27A1|ATP1A3	http://www.genome.jp/kegg-bin/show_pathway?hsa04974/hsa:478%09red/hsa:85301%09red
Prostate cancer	KEGG PATHWAY	hsa05215	2	89	0.506446581108	0.731806632775	CREB5|INSRR	http://www.genome.jp/kegg-bin/show_pathway?hsa05215/hsa:3645%09red/hsa:9586%09red
Glycine, serine and threonine metabolism	KEGG PATHWAY	hsa00260	1	37	0.508537470104	0.731806632775	MAOA	http://www.genome.jp/kegg-bin/show_pathway?hsa00260/hsa:4128%09red
Salivary secretion	KEGG PATHWAY	hsa04970	2	90	0.51242842375	0.731806632775	TRPV6|ATP1A3	http://www.genome.jp/kegg-bin/show_pathway?hsa04970/hsa:55503%09red/hsa:478%09red
Allograft rejection	KEGG PATHWAY	hsa05330	1	38	0.517909996026	0.731806632775	HLA-F	http://www.genome.jp/kegg-bin/show_pathway?hsa05330/hsa:3134%09red
Dilated cardiomyopathy	KEGG PATHWAY	hsa05414	2	91	0.518363031549	0.731806632775	CACNB2|ITGA7	http://www.genome.jp/kegg-bin/show_pathway?hsa05414/hsa:783%09red/hsa:3679%09red
Pyruvate metabolism	KEGG PATHWAY	hsa00620	1	41	0.544976737309	0.759588488889	LDHC	http://www.genome.jp/kegg-bin/show_pathway?hsa00620/hsa:3948%09red
Graft-versus-host disease	KEGG PATHWAY	hsa05332	1	42	0.553659598297	0.759588488889	HLA-F	http://www.genome.jp/kegg-bin/show_pathway?hsa05332/hsa:3134%09red
Phagosome	KEGG PATHWAY	hsa04145	3	154	0.563254637694	0.759588488889	CORO1A|HLA-F|ITGAM	http://www.genome.jp/kegg-bin/show_pathway?hsa04145/hsa:3684%09red/hsa:11151%09red/hsa:3134%09red
Type I diabetes mellitus	KEGG PATHWAY	hsa04940	1	44	0.570535213578	0.759588488889	HLA-F	http://www.genome.jp/kegg-bin/show_pathway?hsa04940/hsa:3134%09red
Valine, leucine and isoleucine degradation	KEGG PATHWAY	hsa00280	1	44	0.570535213578	0.759588488889	BCKDHA	http://www.genome.jp/kegg-bin/show_pathway?hsa00280/hsa:593%09red
Proteasome	KEGG PATHWAY	hsa03050	1	44	0.570535213578	0.759588488889	PSMB9	http://www.genome.jp/kegg-bin/show_pathway?hsa03050/hsa:5698%09red
Jak-STAT signaling pathway	KEGG PATHWAY	hsa04630	3	157	0.576459828172	0.759588488889	IL24|IL23A|SOCS2	http://www.genome.jp/kegg-bin/show_pathway?hsa04630/hsa:8835%09red/hsa:51561%09red/hsa:11009%09red
Carbohydrate digestion and absorption	KEGG PATHWAY	hsa04973	1	45	0.578734086773	0.759588488889	ATP1A3	http://www.genome.jp/kegg-bin/show_pathway?hsa04973/hsa:478%09red
Vasopressin-regulated water reabsorption	KEGG PATHWAY	hsa04962	1	45	0.578734086773	0.759588488889	CREB5	http://www.genome.jp/kegg-bin/show_pathway?hsa04962/hsa:9586%09red
Sphingolipid metabolism	KEGG PATHWAY	hsa00600	1	47	0.594668836242	0.770533191993	SPHK1	http://www.genome.jp/kegg-bin/show_pathway?hsa00600/hsa:8877%09red
Pyrimidine metabolism	KEGG PATHWAY	hsa00240	2	105	0.596331680394	0.770533191993	ENTPD1|POLR2J2	http://www.genome.jp/kegg-bin/show_pathway?hsa00240/hsa:953%09red/hsa:246721%09red
Notch signaling pathway	KEGG PATHWAY	hsa04330	1	48	0.602410495578	0.770533191993	MFNG	http://www.genome.jp/kegg-bin/show_pathway?hsa04330/hsa:4242%09red
N-Glycan biosynthesis	KEGG PATHWAY	hsa00510	1	49	0.610005443661	0.770533191993	ALG5	http://www.genome.jp/kegg-bin/show_pathway?hsa00510/hsa:29880%09red
Amino sugar and nucleotide sugar metabolism	KEGG PATHWAY	hsa00520	1	49	0.610005443661	0.770533191993	RENBP	http://www.genome.jp/kegg-bin/show_pathway?hsa00520/hsa:5973%09red
Alzheimer's disease	KEGG PATHWAY	hsa05010	3	170	0.630758783922	0.786067701935	GRIN2B|GRIN2C|APBB1	http://www.genome.jp/kegg-bin/show_pathway?hsa05010/hsa:2905%09red/hsa:2904%09red/hsa:322%09red
Oocyte meiosis	KEGG PATHWAY	hsa04114	2	112	0.631661546198	0.786067701935	CAMK2A|CAMK2B	http://www.genome.jp/kegg-bin/show_pathway?hsa04114/hsa:816%09red/hsa:815%09red
Staphylococcus aureus infection	KEGG PATHWAY	hsa05150	1	56	0.659287512963	0.814413986602	ITGAM	http://www.genome.jp/kegg-bin/show_pathway?hsa05150/hsa:3684%09red
Toxoplasmosis	KEGG PATHWAY	hsa05145	2	119	0.664559545705	0.814934333419	HSPA6|LAMB4	http://www.genome.jp/kegg-bin/show_pathway?hsa05145/hsa:22798%09red/hsa:3310%09red
Lysosome	KEGG PATHWAY	hsa04142	2	122	0.677925457567	0.823488717364	AP3B2|LAMP3	http://www.genome.jp/kegg-bin/show_pathway?hsa04142/hsa:8120%09red/hsa:27074%09red
Glycolysis / Gluconeogenesis	KEGG PATHWAY	hsa00010	1	66	0.719156883445	0.823488717364	LDHC	http://www.genome.jp/kegg-bin/show_pathway?hsa00010/hsa:3948%09red
Renal cell carcinoma	KEGG PATHWAY	hsa05211	1	66	0.719156883445	0.823488717364	EGLN2	http://www.genome.jp/kegg-bin/show_pathway?hsa05211/hsa:112398%09red
Inflammatory bowel disease (IBD)	KEGG PATHWAY	hsa05321	1	66	0.719156883445	0.823488717364	IL23A	http://www.genome.jp/kegg-bin/show_pathway?hsa05321/hsa:51561%09red
Hepatitis C	KEGG PATHWAY	hsa05160	2	133	0.723283015754	0.823488717364	DDX58|OAS2	http://www.genome.jp/kegg-bin/show_pathway?hsa05160/hsa:4939%09red/hsa:23586%09red
Osteoclast differentiation	KEGG PATHWAY	hsa04380	2	134	0.727129658904	0.823488717364	RELB|IL1R1	http://www.genome.jp/kegg-bin/show_pathway?hsa04380/hsa:5971%09red/hsa:3554%09red
Tight junction	KEGG PATHWAY	hsa04530	2	134	0.727129658904	0.823488717364	RAB3B|PARD6A	http://www.genome.jp/kegg-bin/show_pathway?hsa04530/hsa:50855%09red/hsa:5865%09red
Epithelial cell signaling in Helicobacter pylori infection	KEGG PATHWAY	hsa05120	1	68	0.729813607051	0.823488717364	CCL5	http://www.genome.jp/kegg-bin/show_pathway?hsa05120/hsa:6352%09red
p53 signaling pathway	KEGG PATHWAY	hsa04115	1	68	0.729813607051	0.823488717364	SESN2	http://www.genome.jp/kegg-bin/show_pathway?hsa04115/hsa:83667%09red
PPAR signaling pathway	KEGG PATHWAY	hsa03320	1	71	0.745050988553	0.823488717364	MMP1	http://www.genome.jp/kegg-bin/show_pathway?hsa03320/hsa:4312%09red
Viral myocarditis	KEGG PATHWAY	hsa05416	1	71	0.745050988553	0.823488717364	HLA-F	http://www.genome.jp/kegg-bin/show_pathway?hsa05416/hsa:3134%09red
Melanoma	KEGG PATHWAY	hsa05218	1	71	0.745050988553	0.823488717364	FGF1	http://www.genome.jp/kegg-bin/show_pathway?hsa05218/hsa:2246%09red
Adherens junction	KEGG PATHWAY	hsa04520	1	73	0.754732436559	0.823488717364	PVRL4	http://www.genome.jp/kegg-bin/show_pathway?hsa04520/hsa:81607%09red
Chronic myeloid leukemia	KEGG PATHWAY	hsa05220	1	73	0.754732436559	0.823488717364	SHC2	http://www.genome.jp/kegg-bin/show_pathway?hsa05220/hsa:25759%09red
Leishmaniasis	KEGG PATHWAY	hsa05140	1	73	0.754732436559	0.823488717364	ITGAM	http://www.genome.jp/kegg-bin/show_pathway?hsa05140/hsa:3684%09red
Insulin signaling pathway	KEGG PATHWAY	hsa04910	2	142	0.756312527839	0.823488717364	SHC2|SOCS2	http://www.genome.jp/kegg-bin/show_pathway?hsa04910/hsa:8835%09red/hsa:25759%09red
Drug metabolism - cytochrome P450	KEGG PATHWAY	hsa00982	1	74	0.759435482213	0.823488717364	MAOA	http://www.genome.jp/kegg-bin/show_pathway?hsa00982/hsa:4128%09red
Cell adhesion molecules (CAMs)	KEGG PATHWAY	hsa04514	2	143	0.75976637614	0.823488717364	HLA-F|ITGAM	http://www.genome.jp/kegg-bin/show_pathway?hsa04514/hsa:3684%09red/hsa:3134%09red
Bacterial invasion of epithelial cells	KEGG PATHWAY	hsa05100	1	76	0.768574823907	0.827695964207	SHC2	http://www.genome.jp/kegg-bin/show_pathway?hsa05100/hsa:25759%09red
Chemical carcinogenesis	KEGG PATHWAY	hsa05204	1	83	0.797932503913	0.853838602913	CHRNA7	http://www.genome.jp/kegg-bin/show_pathway?hsa05204/hsa:1139%09red
Apoptosis	KEGG PATHWAY	hsa04210	1	88	0.816609826896	0.868293993155	IL1R1	http://www.genome.jp/kegg-bin/show_pathway?hsa04210/hsa:3554%09red
GABAergic synapse	KEGG PATHWAY	hsa04727	1	90	0.823591779858	0.870210182491	HAP1	http://www.genome.jp/kegg-bin/show_pathway?hsa04727/hsa:9001%09red
Protein processing in endoplasmic reticulum	KEGG PATHWAY	hsa04141	2	167	0.83084716281	0.872169335725	ERO1LB|HSPA6	http://www.genome.jp/kegg-bin/show_pathway?hsa04141/hsa:56605%09red/hsa:3310%09red
Purine metabolism	KEGG PATHWAY	hsa00230	2	169	0.835828946737	0.872169335725	ENTPD1|POLR2J2	http://www.genome.jp/kegg-bin/show_pathway?hsa00230/hsa:953%09red/hsa:246721%09red
Pancreatic secretion	KEGG PATHWAY	hsa04972	1	96	0.842994122638	0.87421612718	ATP1A3	http://www.genome.jp/kegg-bin/show_pathway?hsa04972/hsa:478%09red
Chagas disease (American trypanosomiasis)	KEGG PATHWAY	hsa05142	1	105	0.868197485138	0.894829309835	CCL5	http://www.genome.jp/kegg-bin/show_pathway?hsa05142/hsa:6352%09red
Axon guidance	KEGG PATHWAY	hsa04360	1	129	0.917441778646	0.936097850578	EPHB2	http://www.genome.jp/kegg-bin/show_pathway?hsa04360/hsa:2048%09red
Spliceosome	KEGG PATHWAY	hsa03040	1	131	0.920604488823	0.936097850578	HSPA6	http://www.genome.jp/kegg-bin/show_pathway?hsa03040/hsa:3310%09red
MicroRNAs in cancer	KEGG PATHWAY	hsa05206	3	296	0.924953828548	0.936097850578	CYP24A1|HMGA2|MMP9	http://www.genome.jp/kegg-bin/show_pathway?hsa05206/hsa:4318%09red/hsa:8091%09red/hsa:1591%09red
Metabolic pathways	KEGG PATHWAY	hsa01100	16	1182	0.953046553231	0.958753418819	GALNT16|SPHK1|IDO1|INPP5J|ALG5|MAOA|CYP24A1|FUT3|POLR2J2|BCKDHA|PLA2G4C|HGD|CYP4F3|CYP4F2|PLA2G4E|LDHC	http://www.genome.jp/kegg-bin/show_pathway?hsa01100/hsa:123745%09red/hsa:3948%09red/hsa:3620%09red/hsa:593%09red/hsa:2525%09red/hsa:8877%09red/hsa:27124%09red/hsa:4051%09red/hsa:57452%09red/hsa:29880%09red/hsa:8605%09red/hsa:8529%09red/hsa:1591%09red/hsa:246721%09red/hsa:4128%09red/hsa:3081%09red
Olfactory transduction	KEGG PATHWAY	hsa04740	3	406	0.985571123786	0.985571123786	CNGA4|CAMK2A|CAMK2B	http://www.genome.jp/kegg-bin/show_pathway?hsa04740/hsa:816%09red/hsa:1262%09red/hsa:815%09red
--------------------
#Term	Database	ID	Input number	Background number	P-Value	Corrected P-Value	Input	Hyperlink
--------------------
#Term	Database	ID	Input number	Background number	P-Value	Corrected P-Value	Input	Hyperlink
--------------------
